# Supplementary material for: A Systematic Review of Phase II Targeted Therapy Clinical Trials in Anaplastic Thyroid Cancer
Source: Cancers (Basel). 2019 Jul 4;11(7):943. doi: 10.3390/cancers11070943 (PMC6678800; doi:10.3390/cancers11070943)
Supplement: Supplementary file 1 [file cancers-11-00943-s001.pdf]

# Supplementary Materials: Systematic Review of Advances in Targeted Therapy for Anaplastic Thyroid Cancer

**Table S1.** Reported follow-up, loss to follow-up, and treatment discontinuation in the included trials.

|               | Follow Up Reported | No. of Patients  | Unavailable for Response Evaluation                                              | No. of Treatment Discontinuations                                                                                                  |
|---------------|--------------------|------------------|----------------------------------------------------------------------------------|------------------------------------------------------------------------------------------------------------------------------------|
| Kloos [49]    | No                 | 56 (4 with ATC)  | <b>2 patients (3.4 %)</b><br>- Unreported reasons                                | <b>54 patients (93 %)</b><br>- 35 due to progressive disease<br>- 14 due to AEs<br>- 1 due to other unreported reasons             |
| Savvides [50] | No                 | 20               | <b>2 patients (10 %)</b><br>- Due to disease progression                         | NA                                                                                                                                 |
| Ito [51]      | No                 | 18 (10 with ATC) | None                                                                             | <b>3 patients (17 %)</b><br>- Due to AEs                                                                                           |
| Sherman [52]  | No                 | 36 (2 with ATC)  | <b>6 patients (17 %)</b>                                                         | <b>35 patients (97 %)</b><br>- 12 due to withdrawal of consent<br>- 10 due to progressive disease<br>- 5 due to excessive toxicity |
| Bible [53]    | No                 | 16               | <b>1 patient (6.25 %)</b><br>- Cancellation before treatment for unknown reasons | <b>15 patients (100 %)</b><br>- 12 due to progressive disease<br>- 1 due to death<br>- 2 due to AEs                                |
| Ha [54]       | Yes                | 11               | <b>3 patients (27.3 %)</b><br>- Lack of radiological evaluation                  | <b>1 patient (9 %):</b><br>- AE not related to the treatment or disease                                                            |
| Tahara [55]   | No                 | 60 (17 with ATC) | <b>9 patients (15 %)</b><br>- Did not meet inclusion criteria                    | <b>13 out of 17 ATC patients (77 %)</b><br>- 12 due to progressive disease<br>- 1 due to suicide attempt                           |
| Ravaud [56]   | Yes                | 71 (4 with ATC)  | <b>6 patients (8 %)</b><br>(two with ATC)                                        | <b>62 patients (87 %)</b><br>- 38 due to death<br>- 18 due to loss to follow-up                                                    |
| Hyman [57]    | No*                | 122 (7 with ATC) | <b>2 patients (2 %)</b><br>- Withdrew early, reason not reported                 | <b>At least 4 due to AE** (3 %)</b>                                                                                                |
| Subbiah [58]  | Yes                | 16               | None                                                                             | <b>3 patients (19 %)</b>                                                                                                           |

|                       |     |                 |                                                                                                                                                     |                                                                                                                                                                                                                                                                        |
|-----------------------|-----|-----------------|-----------------------------------------------------------------------------------------------------------------------------------------------------|------------------------------------------------------------------------------------------------------------------------------------------------------------------------------------------------------------------------------------------------------------------------|
|                       |     |                 |                                                                                                                                                     | - 2 due to AE<br>- 1 due to PD                                                                                                                                                                                                                                         |
| <b>Lim [59]</b>       | Yes | 40 (6 with ATC) | <b>5 patients (12.5 %)</b><br>- 2 withdrew consent before treatment for unknown reasons<br>- Outcomes of 3 patients are missing for unknown reasons | <b>23 patients (58 %)</b><br>- 2 withdrew consent before and 3 during treatment for unknown reasons<br>- 1 due to AE<br>- 14 due to disease progression                                                                                                                |
| <b>Schneider [60]</b> | Yes | 35              | None                                                                                                                                                | <b>1 patient (3 %)</b><br>- Due to AE                                                                                                                                                                                                                                  |
| <b>Hanna [34]</b>     | Yes | 50 (7 with ATC) | <b>6 patients (12 %)</b><br>(1 with ATC)                                                                                                            | <b>46 patients (92 %)</b><br>- Progressive disease                                                                                                                                                                                                                     |
| <b>Pennel [61]</b>    | Yes | 27 (5 with ATC) | <b>2 patients (7.4 %)</b><br>- Both due to AE                                                                                                       | <b>2 patients (7.4 %)</b><br>- The same two unavailable for evaluation                                                                                                                                                                                                 |
| <b>Cohen [62]</b>     | Yes | 60 (2 with ATC) | <b>15 patients (25 %)</b><br>- 8 did not meet response criteria<br>- 7 missing post baseline data for unknown reasons                               | <b>60 patients (100 %)</b><br>For both studies:<br>- 20 had insufficient clinical response<br>- 14 planned to enroll in the ongoing extension study<br>- 11 due to non-fatal AEs<br>- 4 due to fatal AEs<br>- 9 refused further participation<br>- 2 lost to follow-up |
| <b>Mooney [63]</b>    | Yes | 26              | None                                                                                                                                                | <b>1 patient (4 %)</b>                                                                                                                                                                                                                                                 |
| <b>Sosa [64]</b>      | No  | 80              | <b>5 patients (6.25 %)</b><br>- 2 due to patient refusal<br>- 1 did not meet inclusion criteria<br>- 1 due to investigators' decision               | <b>50 patients (67 %)</b><br>- 40 due to disease progression<br>- 6 withdrew or refused<br>- 2 due to AE<br>- 1 unreported reason                                                                                                                                      |

\* Study still ongoing. \*\* Only reported for the cohort with Erdheim–Chester disease or Langerhans' cell histiocytosis.
